# Supplementary material
Source: publisher site journal article supplement (https://www.dovepress.com/get_supplementary_file.php?f=395229.docx)
Supplement: Supplementary file 1 [file get_supplementary_file.php]

**
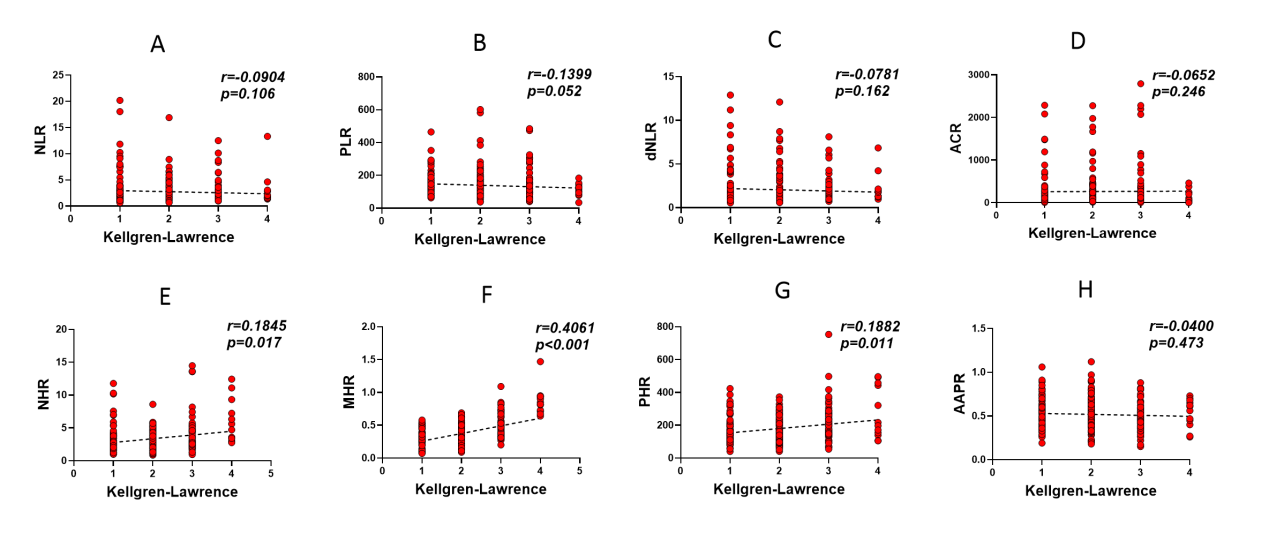
**

**Figure S1** Correlation analyses between Kellgren and Lawrence scores with the derived systemic inflammatory markers. A, NLR; B, PLR; C, dNLR; D, ACR; E, NHR; F, MHR; G, PHR; H, AAPR.

**Abbreviations:** NLR, neutrophil-to-lymphocyte ratio; PLR, platelet-to-lymphocyte ratio; dNLR, derived NLR; ACR, albumin to C-reactive protein ratio; NHR, neutrophil to high density lipoprotein-cholesterol ratio; MHR, monocyte-to-high density lipoprotein-cholesterol ratio; PHR, platelet to high density lipoprotein-cholesterol ratio;AAPR, albumin to alkaline phosphatase ratio.
